# Supplementary material for: Molecular Cytological Analysis and Specific Marker Development in Wheat-Psathyrostachys huashanica Keng 3Ns Additional Line with Elongated Glume
Source: MDPI journal article supplement (doi:10.3390/ijms24076726), 2023-04-04
Supplement: s1 [file s1]

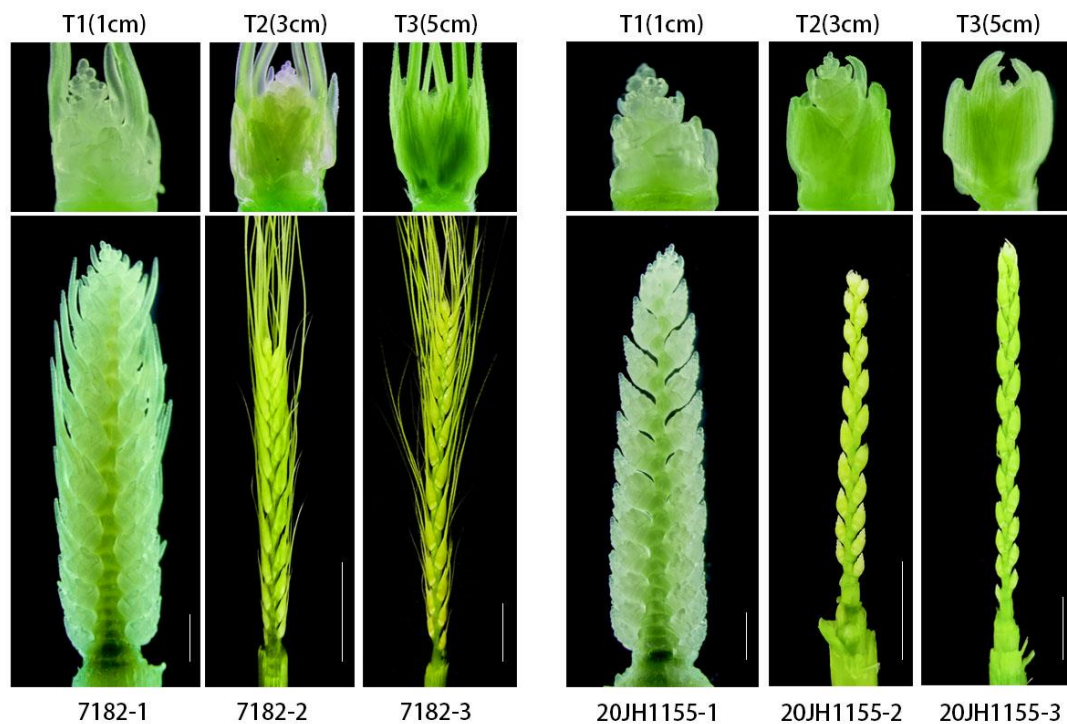

**Supplemental Figure S1.** Developmental stages of spikes used for sampling in this study. T1, T2, T3 correspond to 3 developmental points (Feekes 6,7,8) at jointing stage and booting stage.

A

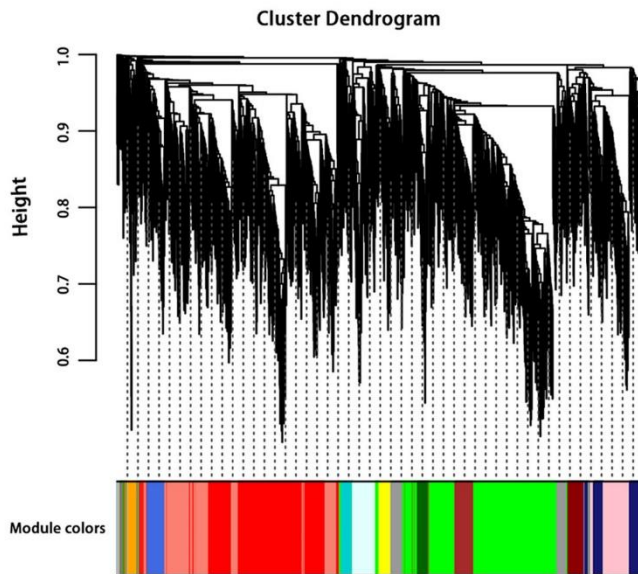

B

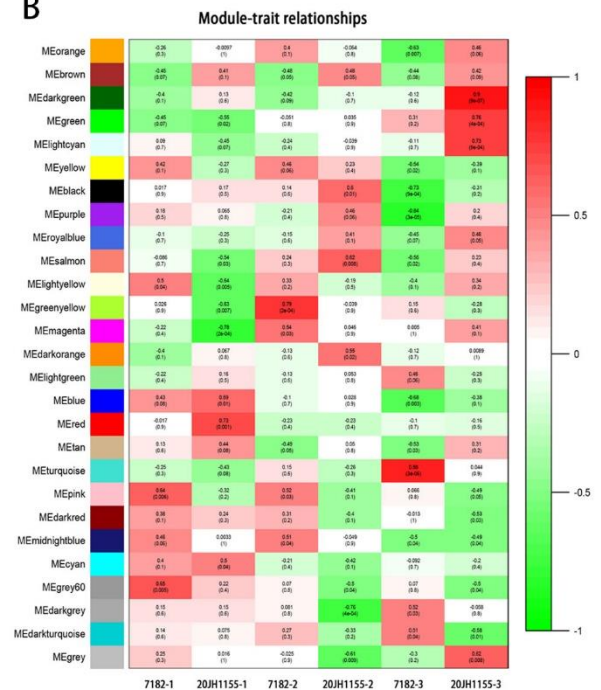

**Supplemental Figure S2.** Clustering and module identification of co expressed genes.

**(A)** Hierarchical clustering tree of DEGs by WGCNA. A total of 27 modules were divided according to gene function. **(B)** Module–time relationships. The value above the box represents the correlation coefficient between the module and time as well as the value below represents the significance between them.
